# Supplementary material for: A Novel Probiotic-Based Oral Vaccine against SARS-CoV-2 Omicron Variant B.1.1.529
Source: MDPI journal article supplement (doi:10.3390/ijms241813931), 2023-09-11
Supplement: s1 [file s1]

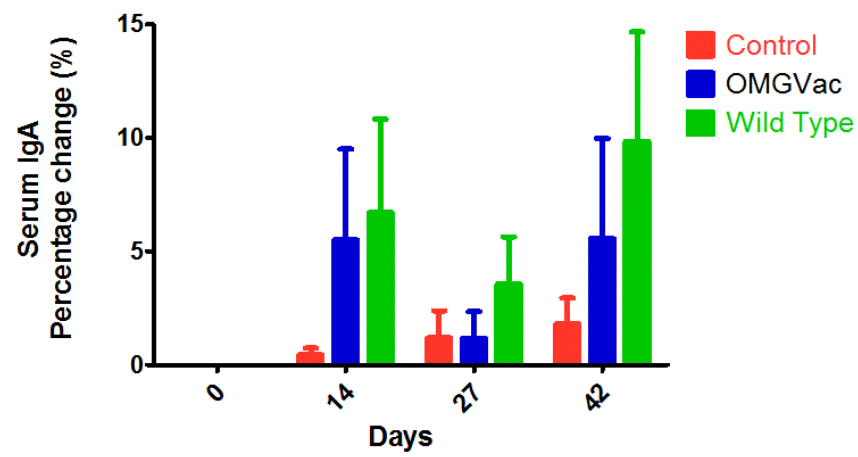

**Figure S1.** Percentage change in serum IgA level of vaccinated hamsters. No significant difference was observed between groups and days ( $p>0.05$ ).
